# Supplementary material for: In vitro culture of leukemic cells in collagen scaffolds and carboxymethyl cellulose-polyethylene glycol gel
Source: PubMed Central journal article supplement (PMC11627079; doi:10.7717/peerj.18637), 2024-12-06

Human RNA (10 ng)

Murine RNA (100 ng)

RNA from an unseeded collagen scaffold

RNA from an unseeded CMC-PEG gel

Nuclease-free water

HPRT1

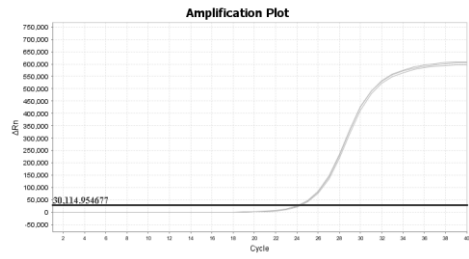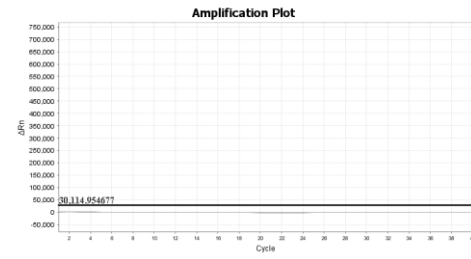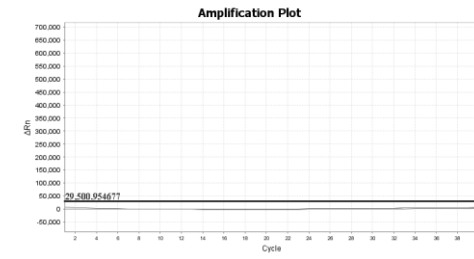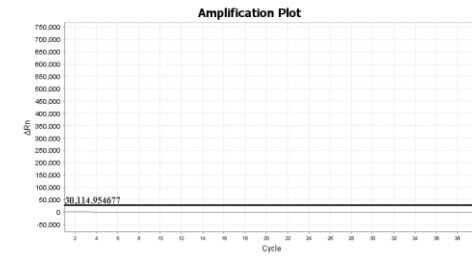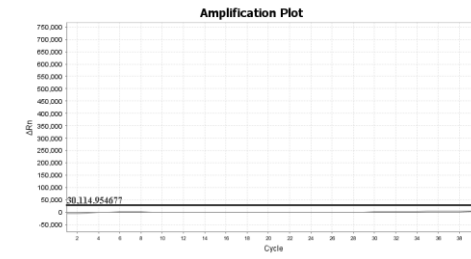

GUSB

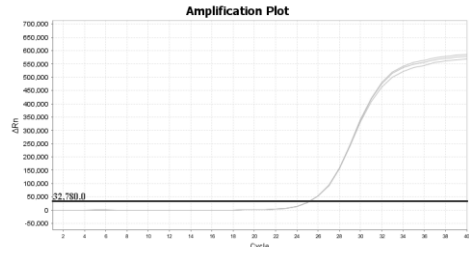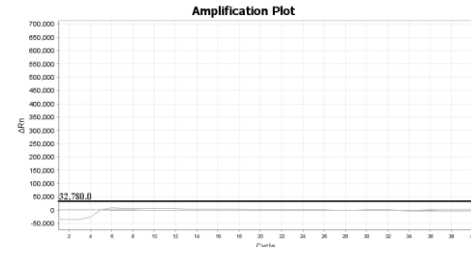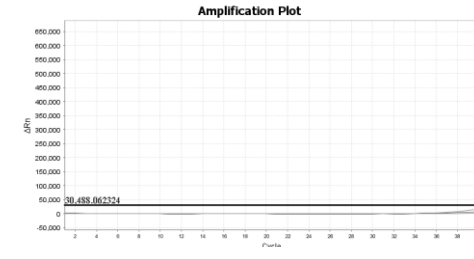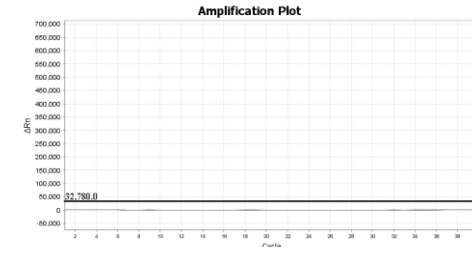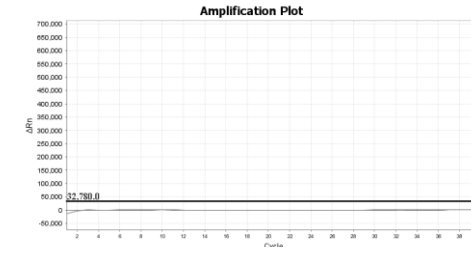

MYC

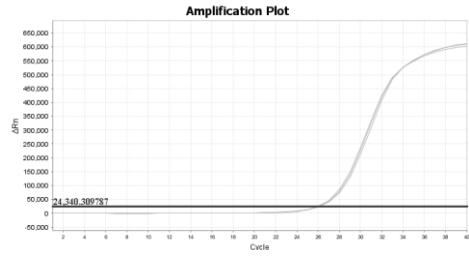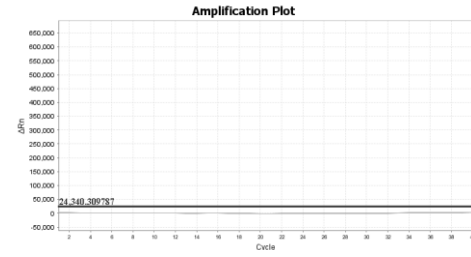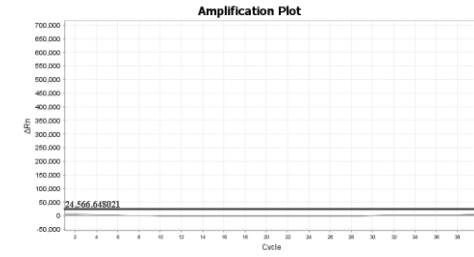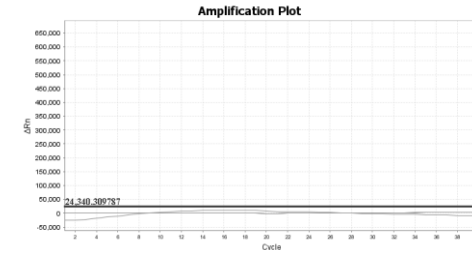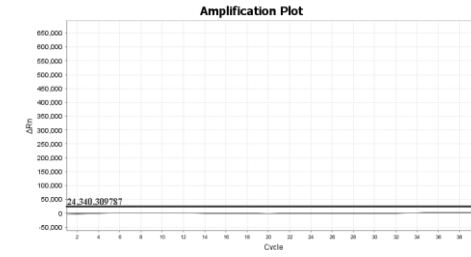

VCAM1

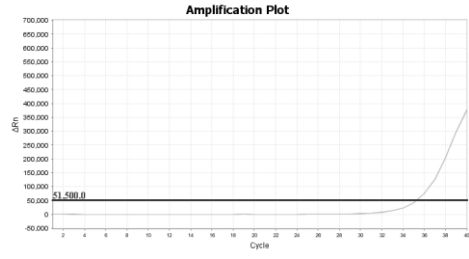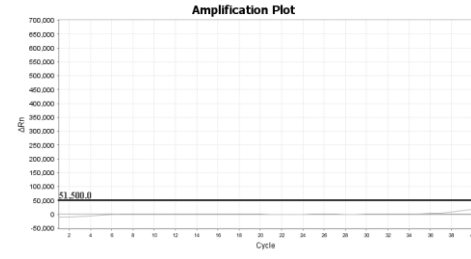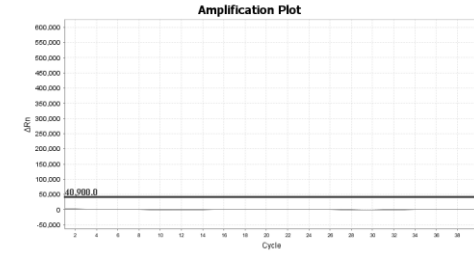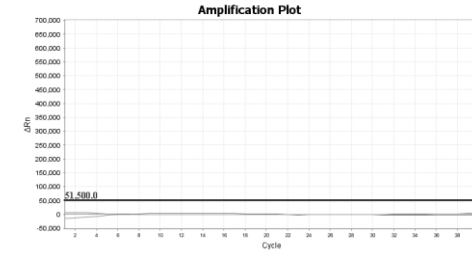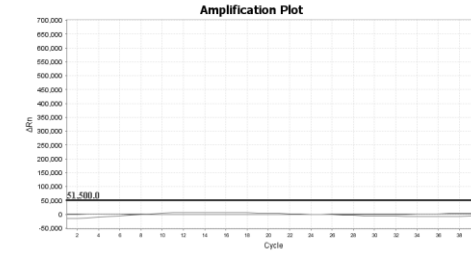

MCL1

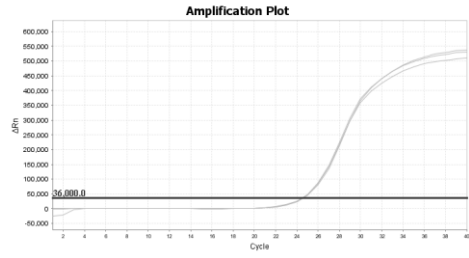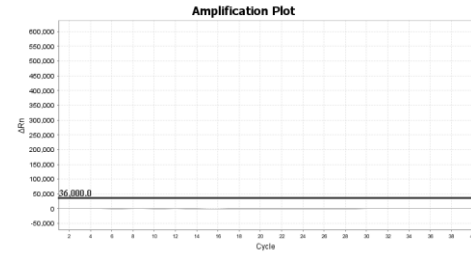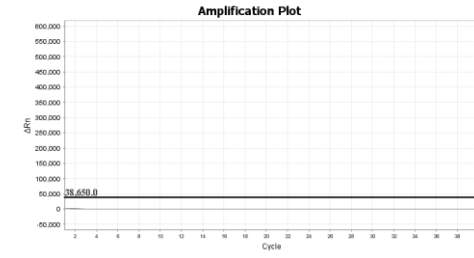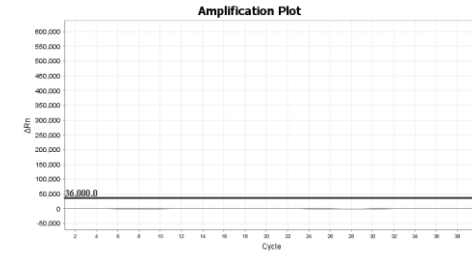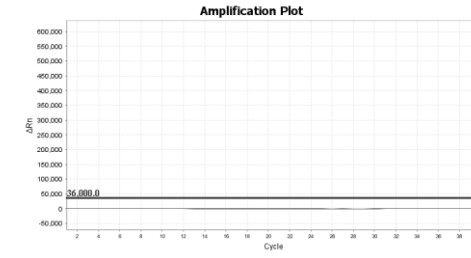

CXCR4

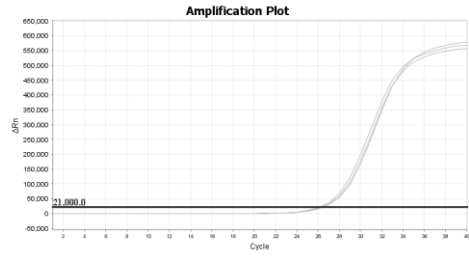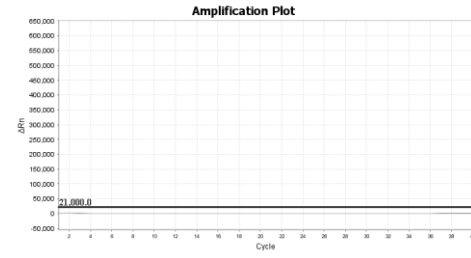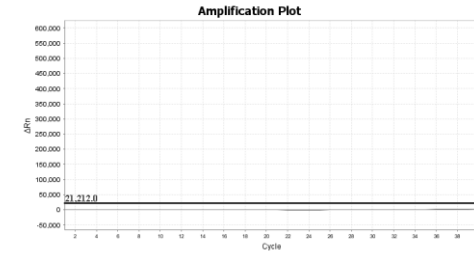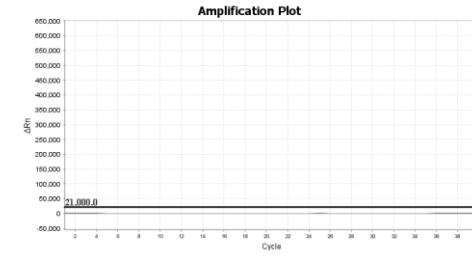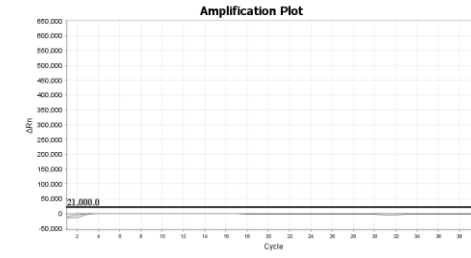

CCL4

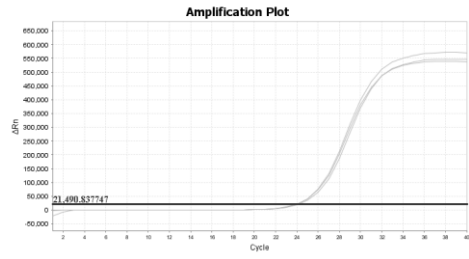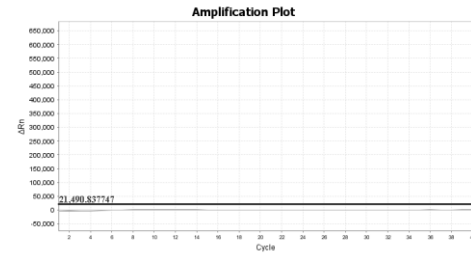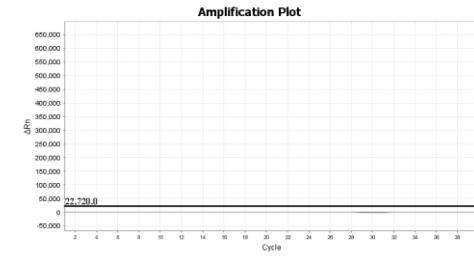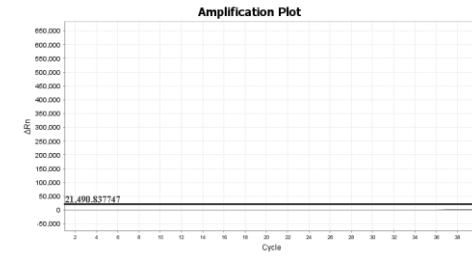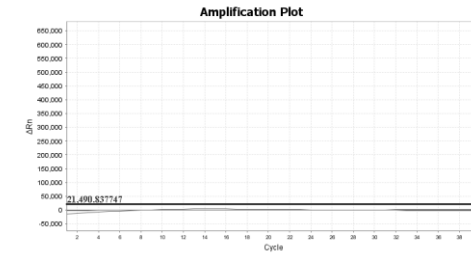

Supplement: peerj-12-18637-s001.pdf [file peerj-12-18637-s001.pdf]
