# Supplementary material for: In vitro culture of leukemic cells in collagen scaffolds and carboxymethyl cellulose-polyethylene glycol gel
Source: PubMed Central journal article supplement (PMC11627079; doi:10.7717/peerj.18637), 2024-12-06

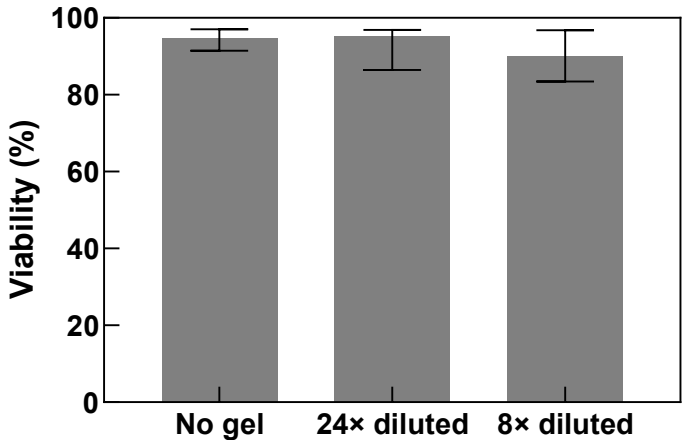

Supplement: peerj-12-18637-s003.pdf [file peerj-12-18637-s003.pdf]
