# Supplementary material for: In vitro culture of leukemic cells in collagen scaffolds and carboxymethyl cellulose-polyethylene glycol gel
Source: PubMed Central journal article supplement (PMC11627079; doi:10.7717/peerj.18637), 2024-12-06
Supplement: peerj-12-18637-s004.pdf [file peerj-12-18637-s004.pdf]

**Group 1:**  
 IGHV unmut  
 TP53 mut  
 NOTCH1 mut

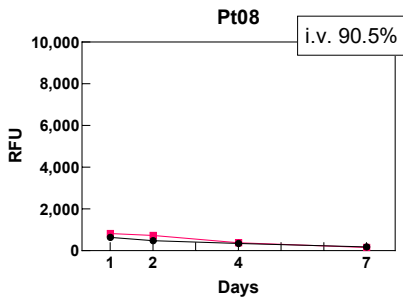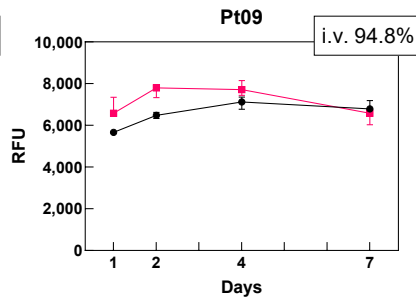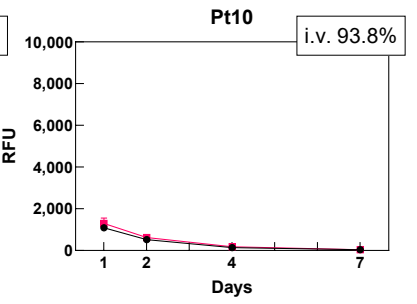

**Group 2:**  
 IGHV unmut  
 TP53 mut  
 NOTCH1 wt

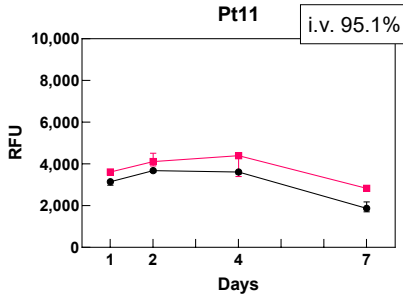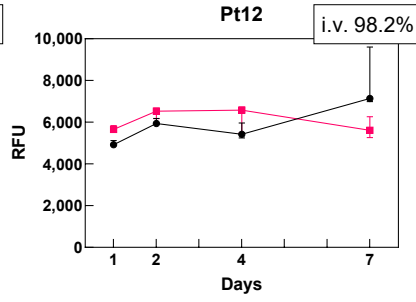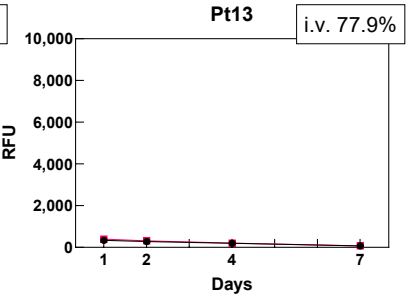

**Group 3:**  
 IGHV unmut  
 TP53 wt  
 NOTCH1 mut

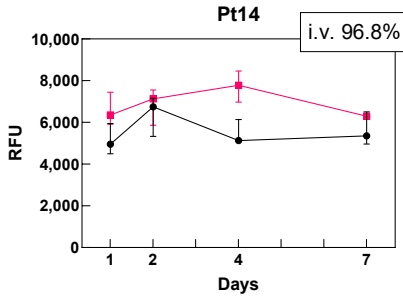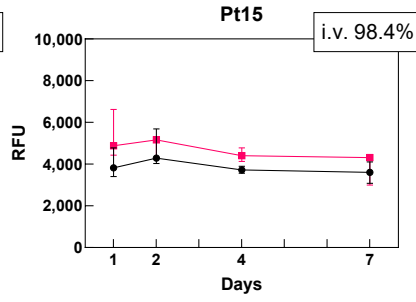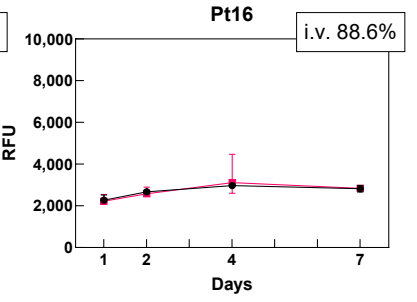

**Group 4:**  
 IGHV unmut  
 TP53 wt  
 NOTCH1 wt

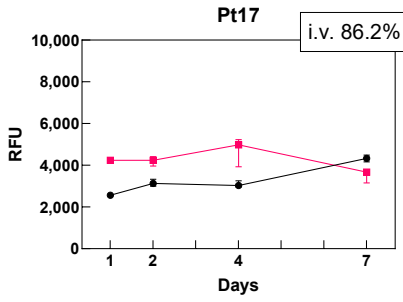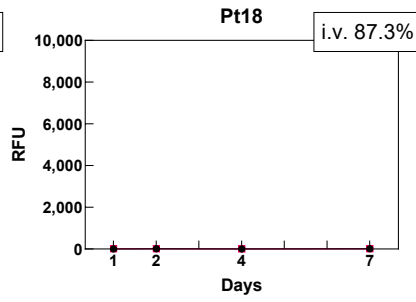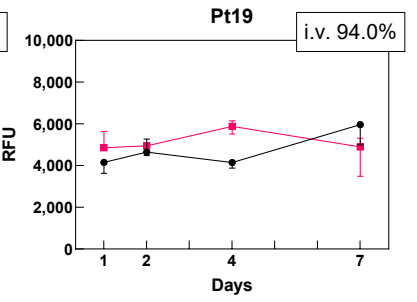

**Group 5:**  
 IGHV mut  
 TP53 wt  
 NOTCH1 wt

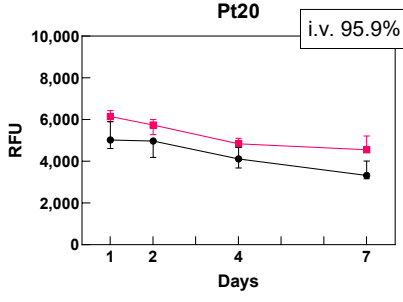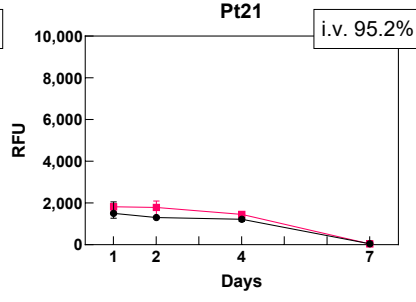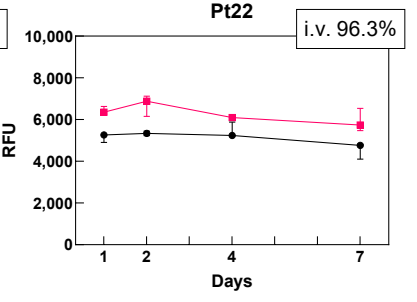

● Conventional      ■ CMC-PEG gel
