# Supplementary material for: In vitro culture of leukemic cells in collagen scaffolds and carboxymethyl cellulose-polyethylene glycol gel
Source: PubMed Central journal article supplement (PMC11627079; doi:10.7717/peerj.18637), 2024-12-06
Supplement: peerj-12-18637-s005.pdf [file peerj-12-18637-s005.pdf]

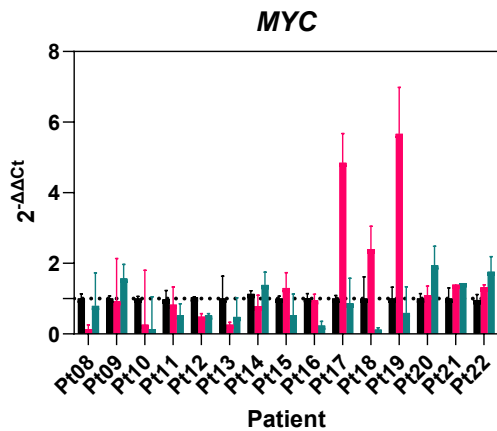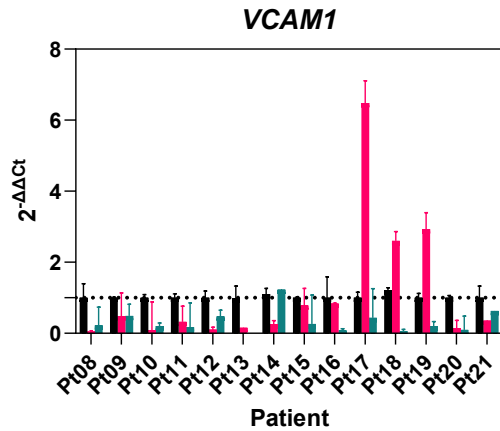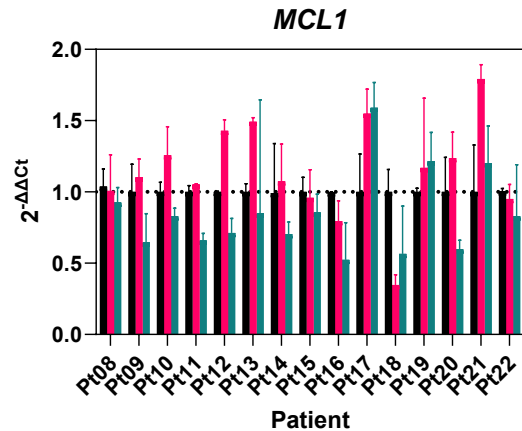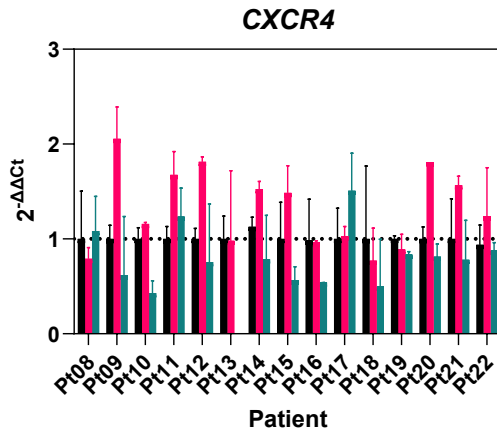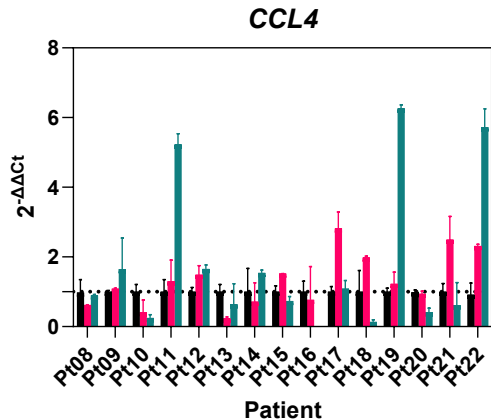

- Conventional
- CMC-PEG gel
- Collagen scaffold
